# Supplementary material
Source: PubMed Central journal article supplement (PMC4004773)
Supplement: me-13-1425.pdf [file me-13-1425.pdf]

1 Supplemental Table 1. Primers used for qRT-PCR analysis.

2

3 Supplemental Figure 1. Characterization of mRNA levels of Notch family members in the pituitary  
4 during early postnatal development. mRNA levels of Notch ligands (A), receptors (B) and targets (C)  
5 were measured at e16.5, p1, p5, p10 and p21 and were compared to levels found in adult pituitaries. \*:p<  
6 0.05, significantly increased compared to adult control. #:p< 0.05, significantly decreased compared to  
7 adult control and n=4.

8

9 Supplemental Figure 2. *Foxg1 Cre* mice do not display altered pituitary development or ability to  
10 influence hypothalamic *Ghrh* neuron number. *Gh* mRNA levels in whole pituitaries of p1 mice with and  
11 without a *Cre* transgene were similar (A). *Ghrh* mRNA expression is similar in the arcuate nucleus  
12 between control (B) and cKO (C) mice at p1. Photos taken at 200x. Scale bars: 50μm. n=3 (*in situ*  
13 hybridization) and n=5-8 (qRT-PCR).

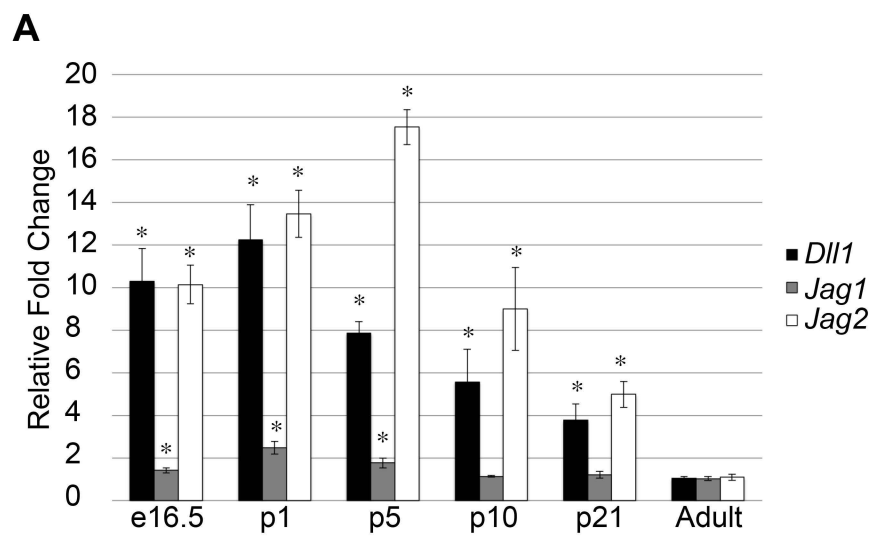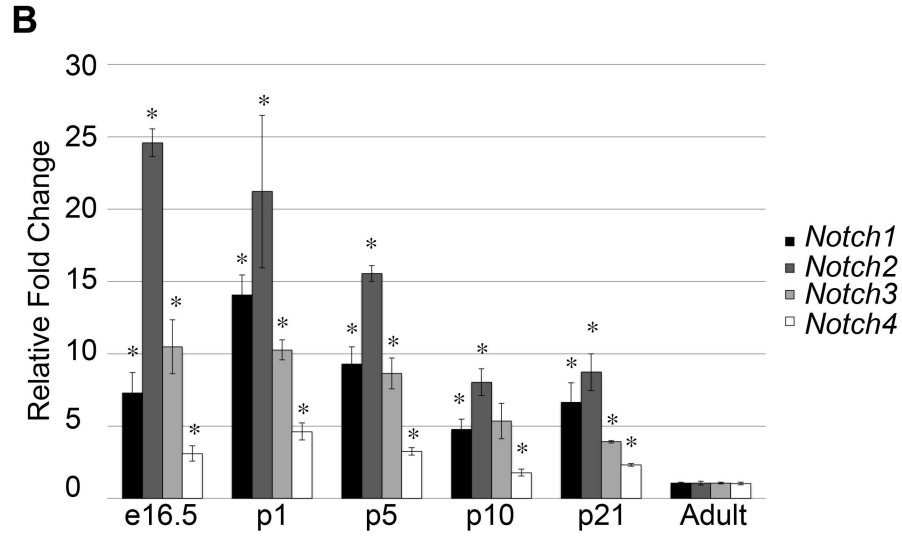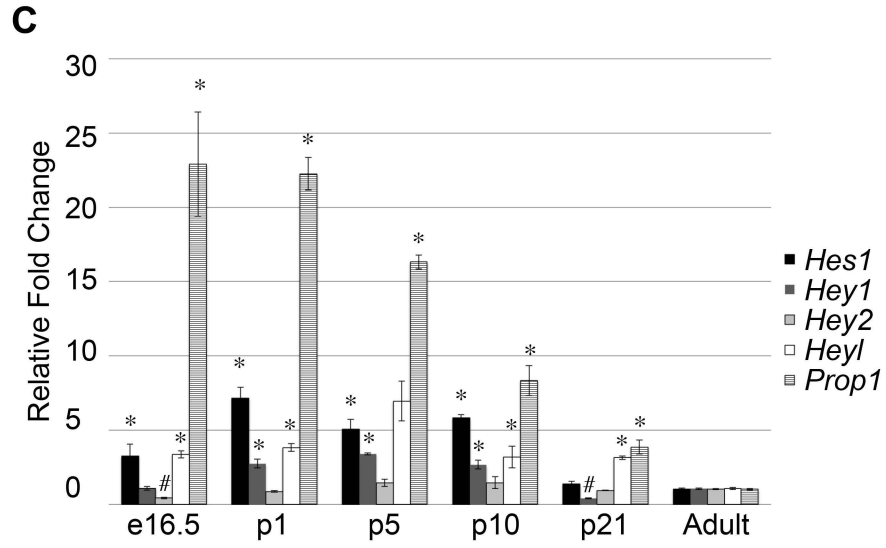

**A**

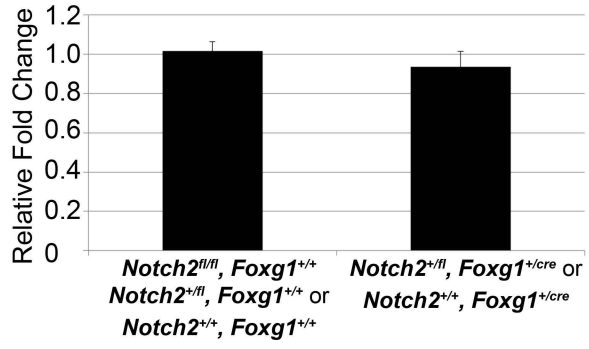

Control

cKO

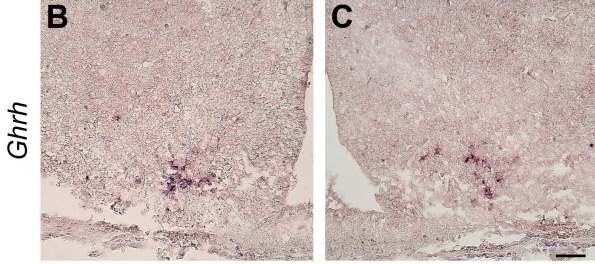

| <b>Gene</b>   | <b>Forward Primer</b>     | <b>Reverse Primer</b>         |
|---------------|---------------------------|-------------------------------|
| <i>Gapdh</i>  | GGTGAGGCCGGTGCTGAGTATG    | GACCCGTTTGGCTCCACCCTTC        |
| <i>Dll1</i>   | TAACCTCGTTTCGAGACCTCAAGGG | TGGCACTTGGTGTACGTTTGC         |
| <i>Jag1</i>   | TGTAGCCAGAAAGTGACTGGTTG   | TGTAGCCAGAAAGTGACTGGTTG       |
| <i>Jag2</i>   | TGGACACGAAAGCGCAGGAAAG    | ACTGGTTGTTGGCGCTCTCATC        |
| <i>Notch1</i> | TTCCATGATTGCCTCCTGCAGTGG  | CAGGATCAGTGGAGTTGTGCCATCATGCA |
| <i>Notch2</i> | TGCCAACTACTCCACCTCTC      | TCCACTGACACTGCTTCC            |
| <i>Notch3</i> | GAAGACCCTTGCCACTCAG       | CCACGGAGACAACGACAG            |
| <i>Notch4</i> | GAGGACCTGGTTGAAGAATTGATC  | TGCAGTTTTTTCCCTTTTATCCC       |
| <i>Hes1</i>   | CTCGCTCACTTCGGACTC        | CTCGCTCACTTCGGACTC            |
| <i>Hey1</i>   | CACGCCACTATGCTCAAT        | CCTTCACCTCACTGCTCTG           |
| <i>Hey2</i>   | GATTCCGAGAGTGCTTGAC       | AGGTGCTGAGATGAGAGAC           |
| <i>Heyl</i>   | GGAACAACAGAGAATGAAC       | CAGCAGTAGTGAGTAACC            |
| <i>Prop1</i>  | CCAGAACCGCAGGGCTAAG       | GGCTATCGGCTGGAGAAGTG          |
| <i>Sox2</i>   | GGAGAAAGAAGAGGAGAGAG      | CTGGCGGAGAATAGTTGG            |
| <i>Sox9</i>   | AGCCGACTCCCACATTTCTCC     | GAGATTGCCAGAGTGCTCGCCC        |
| <i>mKi67</i>  | CCAGGGATCTCAGCGCAATTACAG  | GGATAGGACAGAGGGCCACATTC       |
| <i>Ccne1</i>  | GGCTCCGACCTTTCAGTCCGC     | TGGGTCTTGCAAAAACACGGCC        |
| <i>Cdkn1c</i> | TCCATCACCAATCAGCCAGCAGAA  | ATCGCTGGAGGCCAAGCGTTC         |
| <i>Ccnd1</i>  | ATCGCTGGAGGCCAAGCGTTC     | CTCCTCACAGACCTCCAGCATCCA      |
| <i>Pit1</i>   | AGCTGAGCAGGTCGGAGCTTTGT   | GGAAGGCTTGCTGTGCTCCCC         |
| <i>Gh</i>     | AACTGAAGGACCTGGAAGAG      | GGCGTCAAACCTTGTCATAGG         |
| <i>Tshb</i>   | TGGTCAGGCAGTAGGCACACTCT   | GTGGGTGGAGAAGAGTGAGC          |
| <i>Tpit</i>   | GATGCCAAGGAGAGAAACC       | AGCTTTTCTATCAAATTCCTGA        |
| <i>Pomc</i>   | GTTACGGTGGCTTCATGACCTC    | CGCGTTCTTGATGATGGCGTTC        |
| <i>Crhr1</i>  | TTTGCTGCCCTGCACCTTTAGAC   | AGTGACAGAAAGCTGGCTTGGC        |
| <i>Pax7</i>   | GCACAGAGGACCAAGCTCAC      | TGGTGGTGGGGTAGGTAGAG          |
| <i>Gnrhr</i>  | ATGATGGTCGTGATTAGC        | ATTGCGAGAAGACTGTGG            |
| <i>Nr5a1</i>  | AAATTCCTGAACAACCACAGC     | GCATCTCAATGAGAAGGTTG          |
| <i>Lhb</i>    | CCCAGTCTGCATCACCTTCAC     | GAGGCACAGGAGGCAAAGC           |
